# Supplementary material
Source: PubMed Central journal article supplement (PMC4293448)
Supplement: supp_mol.114.094375_Supplementary_Figure_94375.pdf [file supp_mol.114.094375_Supplementary_Figure_94375.pdf]

Reversing translational suppression and induction of toxicity in pancreatic cancer cells using a chemoprevention gene therapy (CGT) approach

Siddik Sarkar, Bridget A. Quinn, Xuening Shen, Paul Dent, Swadesh K. Das,  
Luni Emdad, Devanand Sarkar and Paul B. Fisher

Supplementary Figure 1

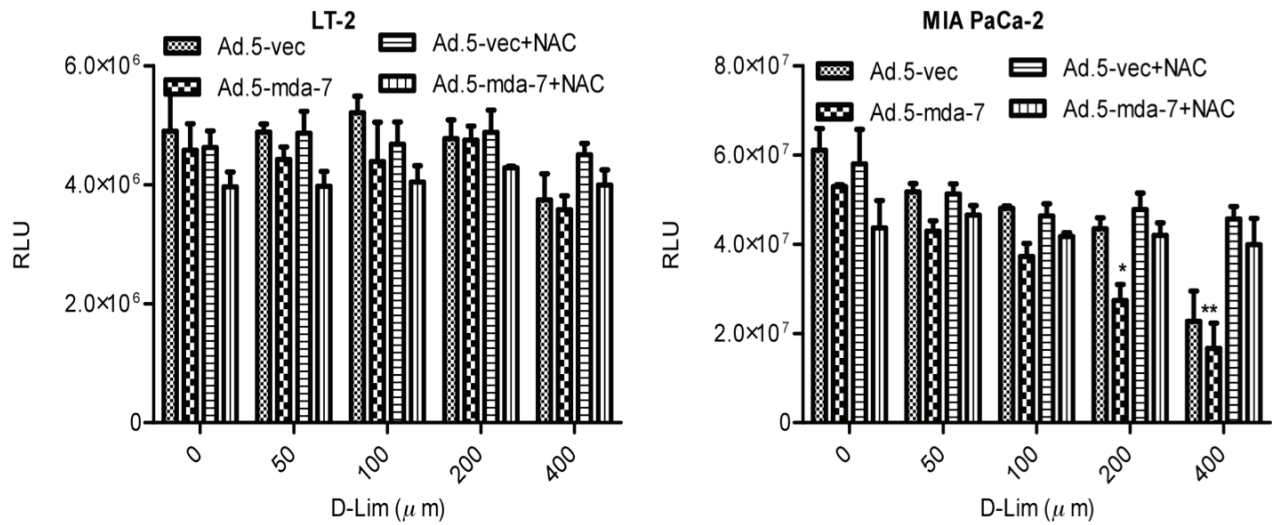

**Figure 1: D-Lim enhances *mda-7*/IL-24-mediated inhibition of cell growth by inducing ROS.** Pancreatic cells were pretreated with 10 mM NAC prior to treatment with Ad.5-*mda-7* (25 pfu/cell) and D-Lim. BrdU incorporation assays were performed on (A) LT2 cells and (B) MIA PaCa-2 cells.
